# Supplementary material for: Comprehensive Identification and Expression Analysis of the YTH Family of RNA-Binding Proteins in Strawberry
Source: MDPI journal article supplement (doi:10.3390/plants12071449), 2023-03-25
Supplement: s1 [file s1]

## Supplementary Informations

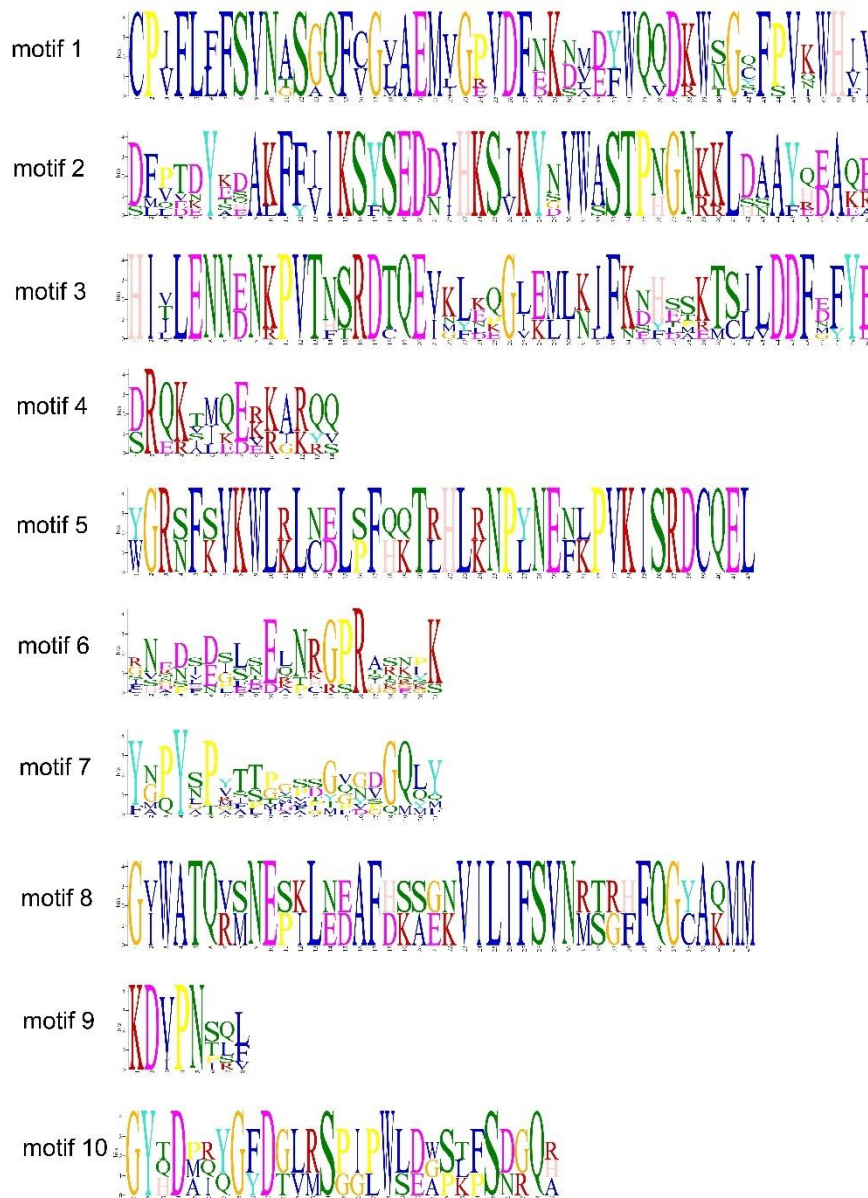

Supplementary Figure S1. Showing the logos of ten motifs in FvYTH proteins. The X axis of sequence logos refers to the amino acid with the highest frequency and the Y axis represents the relative frequency of the corresponding amino acid.

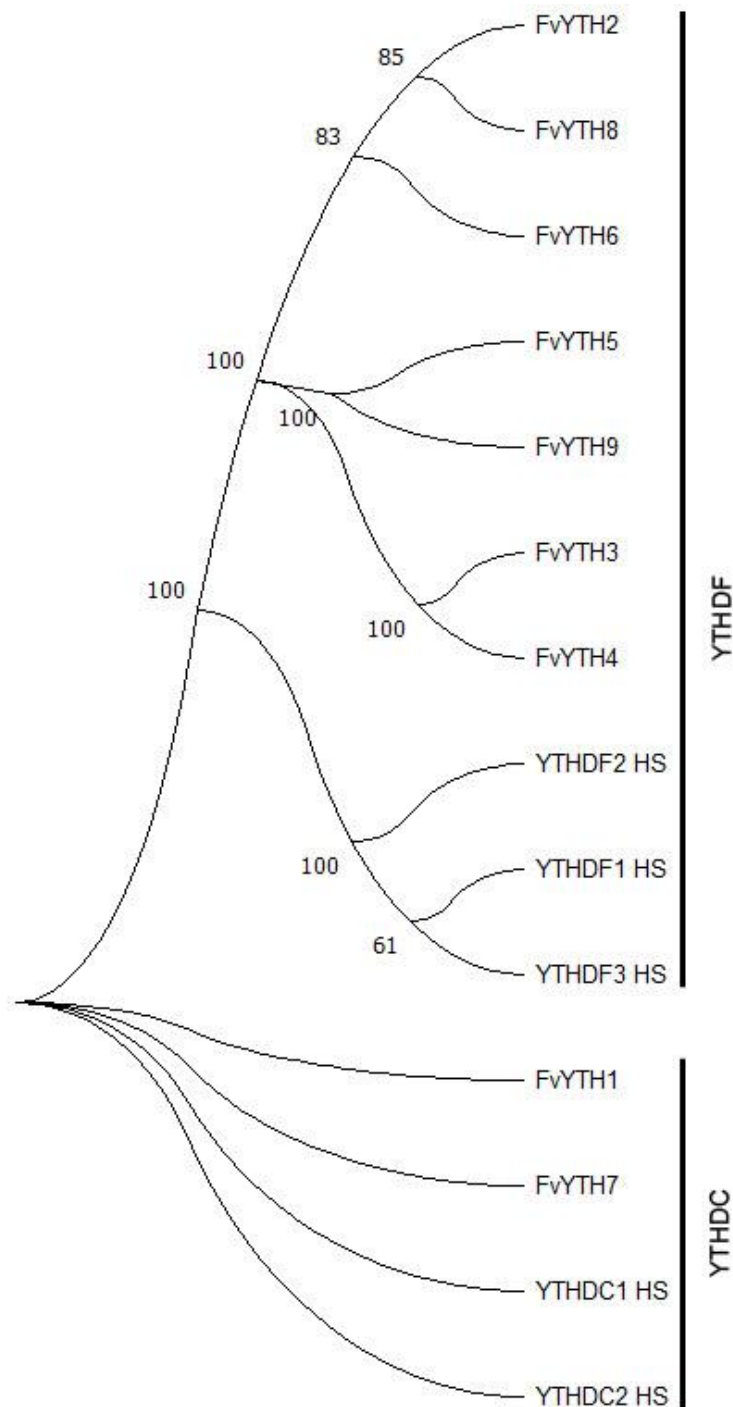

Supplementary Figure S2. Phylogenetic analysis of YTHs in strawberry and humans. The sequences of YTH proteins from strawberry and humans were used to constructed phylogenetic tree by NJ method, with 1000 bootstrap replications. HS represents humans.

|           |                                                      |     |
|-----------|------------------------------------------------------|-----|
| FvYTH2    | ALFFVIKSYSEDDIHKSIKYNVWASTPNGNRRLDNAYQDAQEKAHKGCK    | 50  |
| FvYTH6    | AKFFVIKSYSEDDVHKSVKYNVWSTPHGNKKLISSAYELAQRIAAGNPGG   | 50  |
| FvYTH8    | AKFYVIKSYSEDDVHKSIKYDVWASTPNGNKKLIAAFRIAEAKSSETGKR   | 50  |
| FvYTH3    | AKFFIIKSYSEDDVHKSIKYNVWASTPNGNKKLIAAYQEAQEKTTGG....  | 46  |
| FvYTH4    | AKFFIIKSYSEDDVHKSVKYNVWASTPNGNKKLIAAYQEAQEIATG....   | 46  |
| FvYTH5    | AKFFIIKSYSEDDNVHKSIKYSVWASTPHGNKKLIAAYHEAKRIKCS....  | 46  |
| FvYTH9    | AKFFIIKSYSEDDNVHKSIKYGVWASTPNGNRKLLAAYHEAKEKHDS....  | 46  |
| YTHDF1_HS | GRVFIIKSYSEDDIHRSIKYSTIWCSTEHGNKRILDSAFRCMSS..KG.... | 44  |
| YTHDF2_HS | GRVFIIKSYSEDDIHRSIKYNIWGSTEHGNKRLLAAYRSMNG..KG....   | 44  |
| YTHDF3_HS | GRVFIIKSYSEDDIHRSIKYSIWGSTEHGNKRLLAAYRSLNG..KG....   | 44  |
|           |                                                      |     |
| FvYTH2    | CPVFLLFSVNASGQFCGVAEMVGRVDFNKNMEFWQCDKWNQYEPVKWHII   | 100 |
| FvYTH6    | CPIFLLFSVNASGQFCGVAEMVGVDFNKMDFWQCDKWSGSEFPVIWHIV    | 100 |
| FvYTH8    | CPIFLLFSVNGSGQFVGLAEMIGEVDFNKMDFWQVLDKWSGFFFPVNWVHV  | 100 |
| FvYTH3    | CPVFLLFSVNTSGQFVGLAEMLGFVDFNKNLEYWQCDKWNQCFSVKWHFV   | 96  |
| FvYTH4    | CPVFLLFSVNASGQFVGLAEMVGVDFEKNVEYWQCDKWTGCEFPVKWHIV   | 96  |
| FvYTH5    | CPIFLLFSVNASGQFCGVAEMVGVDFEKLADYWQCDRWNGQFVPQWHII    | 96  |
| FvYTH9    | CPIFLLFSVNASACFCGVAEMVGVDFDKSVDYWQCDKWSGQFVPVKWHVI   | 96  |
| YTHDF1_HS | .PVYLLFSVNGSGHFCGVAEMKSPVDYGTSAQVWSQDKWKGFQVQWIFV    | 93  |
| YTHDF2_HS | .PVYLLFSVNGSGHFCGVAEMKSAVDYNTCAGVWSQDKWKGRFQVQWIFV   | 93  |
| YTHDF3_HS | .PLYLLFSVNGSGHFCGVAEMKSVVDYNAYAGVWSQDKWKGFQVQWIFV    | 93  |
|           |                                                      |     |
| FvYTH2    | KDVPNPQLRHIILENNENKPVINSRDTQEVKFLQGVEMLNIFK          | 143 |
| FvYTH6    | KDVPNTSVRHIVLENNENKPVINSRDTQEIYKKGLEMLIKIFK          | 143 |
| FvYTH8    | KDIPNTQLRHIILENNENKPVITFRDTQEIGLKQGLEMLNIFK          | 143 |
| FvYTH3    | KDVPNSLLKHIILENNENKPVINSRDTQEVKLEPGLKMIKIFK          | 139 |
| FvYTH4    | KDVPNSLLKHIILENNENKPVINSRDTQEVKLEGLKLIKIFK           | 139 |
| FvYTH5    | KDVPNIRFRHIILENNENKPVITHSRDQEVNINQGIELLIKIFN         | 139 |
| FvYTH9    | KDVPNSQFRHIVLENNENKPVINSRDTQEVKLEQGIEMLNIFK          | 139 |
| YTHDF1_HS | KDVPNNQLRHIRLENNENKPVINSRDTQEVPLEKAKQVLKIISSY        | 138 |
| YTHDF2_HS | KDVPNSQLRHIRLENNENKPVINSRDTQEVPLEKAKQVLKIIASY        | 138 |
| YTHDF3_HS | KDVPNNQLRHIRLENNENKPVINSRDTQEVPLEKAKQVLKIIATF        | 138 |

Supplementary Figure S3. Sequence alignments YTHDFs in strawberry and humans. The conserved amino acids involved in cage formation are indicated with asterisks.

|           |                                                     |     |
|-----------|-----------------------------------------------------|-----|
| FvYTH1    | SRVFIVKSCNRENLELSVQCGVWATQRSNESKINEAEDSAENVILIFSVN  | 50  |
| FvYTH7    | TRYFIIKSLSHENIQLSIEKGIWATQVMNEPILEIAFHKSGKVILIFSVN  | 50  |
| YTHDC1_HS | ARFELIKSNHENVSLAKAKGVWSTLPVNEKKLNIAERSARSVILIFSVR   | 50  |
| YTHDC2_HS | VRYFIMKSSNLRLNLEISQCKIWSITPSNERKLNRAEWESSIVYIVFSVO  | 50  |
|           |                                                     |     |
| FvYTH1    | RTRHFQGC AKMMSRIGGSVSGGNWKYAHGTAH..YGRNESVKWLKLCELS | 98  |
| FvYTH7    | MSGFFQGYAQMMSAVGWRRD.NVWSQGSRSNP.WGRSEKVKWLRRLNDLP  | 98  |
| YTHDC1_HS | ESGKFQGFARLSSESHHGGSPHWWLFAGMSAKMLGGVEKIDWICRRELP   | 100 |
| YTHDC2_HS | GSGHFQGF SRMSSEIGREKS.QDWGSAG.....LGGVEKVEWIRKESLP  | 93  |
|           |                                                     |     |
| FvYTH1    | FHKTRHILRNPNENLEVKISRDQBLEPSIGECLIASIL              | 136 |
| FvYTH7    | FQOTLHLKNPLNEFKVKISRDQBLESPDVGEALCELLD              | 137 |
| YTHDC1_HS | FTKSAHLINPNWNEHKVKIGRDQBLELECGTCLCILFPPD            | 141 |
| YTHDC2_HS | FQFAHHLINPNWNDNKKVCISRDQBLEPLVGECLICLWERL           | 134 |

Supplementary Figure S4. Sequence alignments YTHDCs in strawberry and humans. The conserved amino acids involved in cage formation are indicated with asterisks.

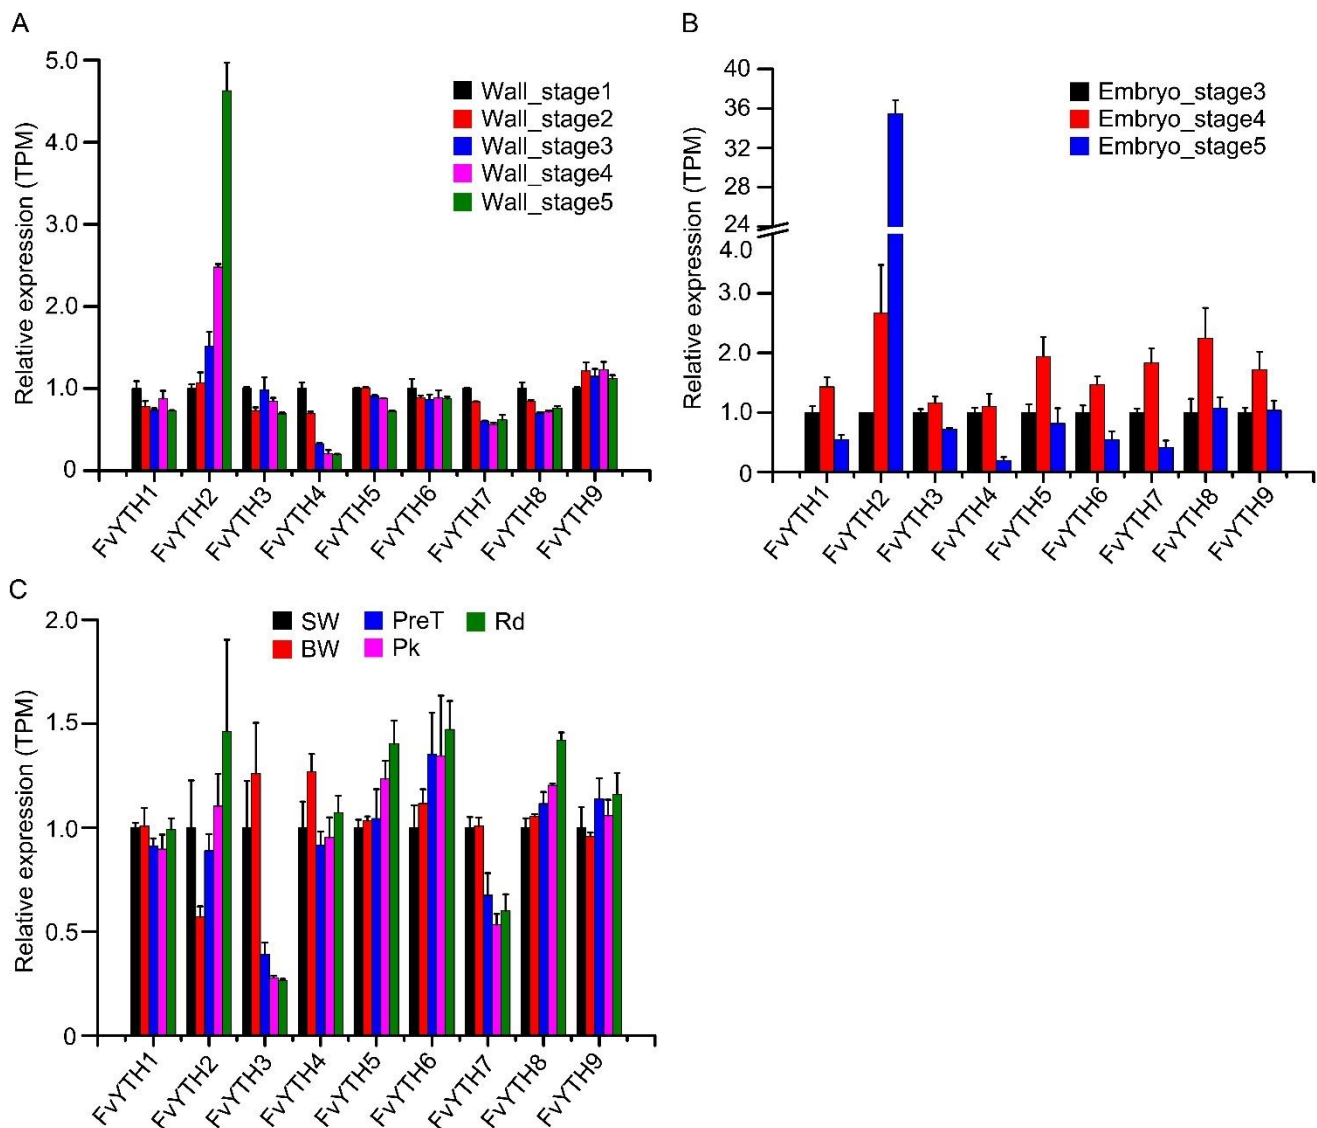

Supplementary Figure S5. The expression trends of *FvYTH* genes in different development stages. The expression trends of *FvYTH* genes in different development stages of carpel wall (A), embryo (B), and fruit (C). The TPM value of the selected first stage was



normalized as 1. SW: small white stage; BW: big white stage; PreT: pre-turning stage; Pk: pink stage; Rd: red stage.

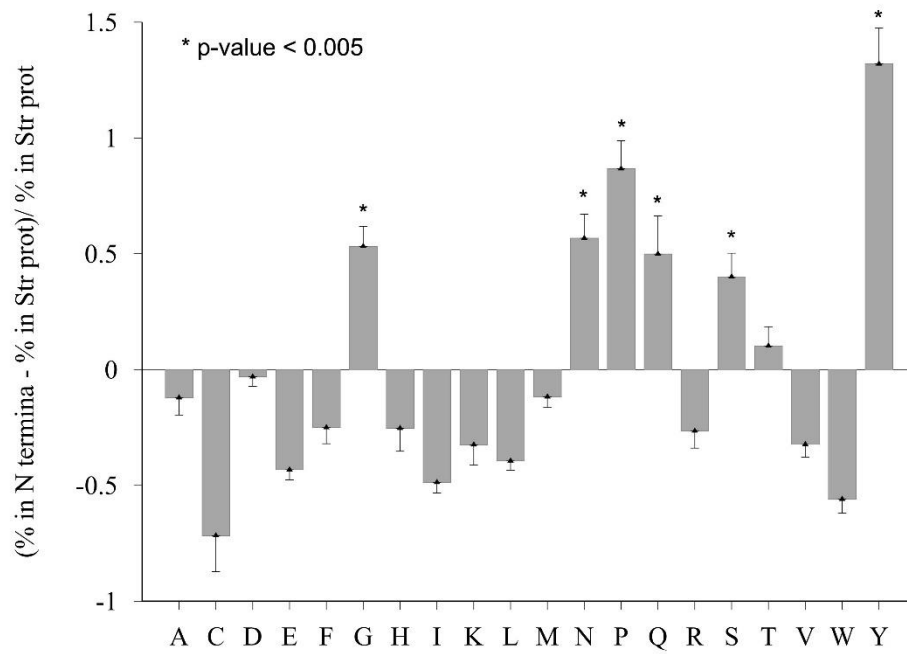

Supplementary Figure S6. The bias in composition of the N terminal of YTH proteins compared with all strawberry proteins. The y axis represents the proportion of each amino acid in the N-terminal region compared with a data base of all Strawberry proteins. The richer amino acids are statistically ( $P < 0.005$ ) overrepresented in this region. Statistical significance associated with a specific enrichment or depletion is estimated using the two-sample t test including a Bonferroni correction according to the Composition Profiler website (<http://www.cprofiler.org> (accessed on 22/2/2023)).

**Supplementary Table S1. The identification of *FvYTH* genes in strawberry.**

| Target       | Query Name | Accession  | E-value  | score |
|--------------|------------|------------|----------|-------|
| FvH4_3g09980 | YTH        | PF04146.15 | 5.10E-47 | 161.7 |
| FvH4_3g13840 | YTH        | PF04146.15 | 4.70E-39 | 135.8 |
| FvH4_3g45840 | YTH        | PF04146.15 | 1.90E-39 | 137.1 |
| FvH4_3g45841 | YTH        | PF04146.15 | 8.40E-41 | 141.5 |
| FvH4_4g00190 | YTH        | PF04146.15 | 2.50E-40 | 140   |
| FvH4_4g21030 | YTH        | PF04146.15 | 9.60E-40 | 138   |
| FvH4_5g01140 | YTH        | PF04146.15 | 8.90E-50 | 170.7 |
| FvH4_5g30420 | YTH        | PF04146.15 | 2.80E-37 | 130   |
| FvH4_6g36470 | YTH        | PF04146.15 | 4.20E-40 | 139.2 |

**Supplementary Table S2. The properties of YTH proteins.**

| Gene Name | Gene ID      | LOCALIZER           | Plant-mPLOC | Instability Index | Grand Average of Hydropathicity (GRAVY) |
|-----------|--------------|---------------------|-------------|-------------------|-----------------------------------------|
| FvYTH1    | FvH4_3g09980 | Y (RRSRHGEGKKRRDS)  | Nucleus     | 56.69             | -0.964                                  |
| FvYTH2    | FvH4_3g13840 | Y (KRIR)            | Nucleus     | 40.8              | -0.733                                  |
| FvYTH3    | FvH4_3g45840 | -                   | Nucleus     | 34.12             | -0.741                                  |
| FvYTH4    | FvH4_3g45841 | Y (AKRQIRKKK)       | Nucleus     | 35.51             | -0.732                                  |
| FvYTH5    | FvH4_4g00190 | Y (KKLDAAYHEAKRIKC) | Nucleus     | 49.96             | -0.672                                  |
| FvYTH6    | FvH4_4g21030 | -                   | Nucleus     | 32.59             | -0.593                                  |
| FvYTH7    | FvH4_5g01140 | Y (FKVK)            | Nucleus     | 59.27             | -0.853                                  |
| FvYTH8    | FvH4_5g30420 | -                   | Nucleus     | 31.99             | -0.696                                  |
| FvYTH9    | FvH4_6g36470 | -                   | Nucleus     | 41.52             | -0.685                                  |

**Supplementary Table S3. The syteny relationships between forest strawberry and *Arabidopsis*.**

| chromosome | geneid    |    | chromosome | gene name |
|------------|-----------|----|------------|-----------|
| At--Chr1   | AT1G55500 | == | Str--Fvb3  | FvYTH3    |
| At--Chr1   | AT1G30460 | == | Str--Fvb3  | FvYTH1    |
| At--Chr1   | AT1G79270 | == | Str--Fvb3  | FvYTH2    |
| At--Chr1   | AT1G48110 | == | Str--Fvb4  | FvYTH6    |
| At--Chr3   | AT3G13460 | == | Str--Fvb3  | FvYTH3    |
| At--Chr3   | AT3G17330 | == | Str--Fvb4  | FvYTH6    |
| At--Chr3   | AT3G13060 | == | Str--Fvb6  | FvYTH9    |
| At--Chr4   | AT4G11970 | == | Str--Fvb5  | FvYTH7    |

**Supplementary Table S4. The sequences of YTH domain from strawberry, rice, *Arabidopsis*.**

| Name     | Sequences                                                                                                                                                                           |
|----------|-------------------------------------------------------------------------------------------------------------------------------------------------------------------------------------|
| AtECT1   | AKFFVIKSYSEDDVHNCIKYGAWSSSTPTGNKKLNAAYYEAKENSQECPVYLLFSVNASGQFVGLAEMVGPVDFNKTMEYWQQDK<br>WIGCFPVKWHIIKDIPNSLLRHITLANNENKPV TNSRDTQEVNLEHG TKI IKIFK                                 |
| AtECT2   | AMFFIIKSYSEDDVHKS IKYNVWASTPNGNKKLAAAYQEAQQKAGGCPIFLFFSVNASGQFVGLAEMTGPVDFNTNVEYWQQDKW<br>TGSFPLKWHIVKDVPNSLLKHITLNNENKPV TNSRDTQEVKLEQGLKIVKIFK                                    |
| AtECT3   | AKFYVIKSYSEDDIHKS IKYSVWSSTPNGNKKLDASYNEAKQKSDGCPVFLFFSVNTSGQFVGLAEMVGPVDFNKTVEYWQQDKW<br>IGCFPVKWHFVKDIPNSSLRHITLNNENKPV TNSRDTQEVKLEQGIKVIKIFK                                    |
| AtECT4   | AKFFIIKSYSEDDVHKS IKYNVWASTPNGNKKLDAAYQEAQQKSSGCPVFLFFSVNASGQFIGLAEMKGPVDFNKNIEYWQQDKW<br>TGSFPLKWHILKDVPNSLLKHITL EYNENKPV TNSRDTQEVKLEQGLKVVKIFK                                  |
| AtECT5   | AKLFIKSYSEDNVHKS IKYNVWASTPNGNKKLDAAYREAKDEKEPCPLFLFFSVNASSQFCGVAEMVGPVDFEKSVDYWQQDKW<br>SGQFPVKWHIIKDVPNSQFRHIILENNDNKPV TNSRDTQEVKLEQGIEMLKIFK                                    |
| AtECT6   | ARFFVIKSYSEDDVHKS IKYGVWSSTLNGNKKLQSVYEDAQRIATEKSRECPFLFFSVNSSGLFCGVAEMTGPVSFDRDMDFWQ<br>QDKWSGSFVPVKWHIIKDVPNSYFRHIILHNNENKPV TNSRDTQEILKQGLEVLKLFK                                |
| AtECT7   | AKFFVIKSYSEDDVHKS IKYNVWSSTLHG NKKLQSAYEDAQRIATEKSCECPFLFFSVNASGLFCGMAEMTGPVSFDKDMDFWQ<br>QDKWSGSFVPVKWHIIKDVPNSYFRHIILQNNENKPV TNSRDTQEIMLKQGLEVLKIFK                              |
| AtECT8   | AIFFVIKSYSEDDIHKS IKYNVWSSTLNGNKKLDSAYQESQKKAADKSGKCPVFLFFSVNASGQFCGVAEMIGRVDYEKSMEFWQ<br>QDKWTGYFPVKWHIIKDVPNPQLRHIILENNENKPV TNSRDTQEVRLPQGNEVLNIFK                               |
| AtECT9   | AKFFVIKSYSEDNVHKS IKHCVWASTKNGNKKLDAAYREAKKKDVACPVFLFFSVNASSQFCGVAEMVGPVDFNTSVEYWQQDR<br>WSGHFPVQWLIVKDVPNSLFRHIIIESNDNKPV TNSRDTQEVGLEKGIEMLDIFISC EMRSSILDDFN FYEERQIAIQDRKARQRAV |
| AtECT10  | AKFFIVKSFSEDNVHRS IKYNVWASTPHGNKKLDTAYRDAEKMGGKCPFLFFSVNASGQFCGVSEM VGPVDFEKDAGYWQQD<br>RWSGQFPVKWHIVKDIPNNRFCHILLQNNDNKPV THSRDSQEVKL RQGIEMLRIFK                                  |
| AtECT11  | AKFFVIKSYSEDDVHKS IKYSVWSSTINGNKKLDAAFRDAETKTLEDGKKRPIFLFFSVNASRQFVGLAEMVGYVDFNKLDFWQ<br>VDKWSGFFPV EWHVVKDIPNWELRHILDNNEDKPV THTRDTHEIKLKEGLQMLSIFK                                |
| AtECT12  | TRYFIIKSLNYDNIQVSVEKGIWATQVMNEPILEGAFHKSGRVILF SVNMSGFFQGYAEMLSPVGWRRDQIWSQGGGKNNPWG<br>RSFKVKWLR LSELFPQKTLHLKNPLNDYKPVKISRDCQELPEDIGEALCELLD                                      |
| AtCPSF30 | RYFVVKSNNREN FELSVQQGVWATQRSNEAKLNEAFDSVENVILIFSVNRTRHFQGC AKMTSRIGGYIGGGNWKHEHGTAQYGR<br>NFSVKWLKLCELSFHKTRNL RNPYNENLPVKISRDCQELEPSVGEQLAS LL                                     |
| OsECT1   | ARFFIIKSYSEDNVHKS IKYGVWASTTNGNKKLDSAYREAKEEHCPIFLFFSVN ASAQFCGVAEMIGPVDFEKSVDYWQQDKW<br>TGQFPVKWHIVKDVPNNLFRHIILENNDNKPV TNSRDTQEVKLEQGMEMLKIFK                                    |
| OsECT2   | RYFIVKSCNRENLEISVQQGIWATQRSNEAKLNEAFESIENVILIFSINRTRNFQGC AKMTSRIGGYIGGGNWKSAHGTAHYGRNF<br>SIQWLKLCELSFQKTHHLRNPYNDNLPVKISRDCQELEPFIGEQLASLL                                        |
| OsECT3   | AKFFVIKSYTEDHVHRS IKYNVWASTASGNRKLDSAYRLAKEKEDYCPILFFSVNGSGQFCGVAEMIGPVDFDKSVDYWQQDK                                                                                                |

|         |                                                                                          |
|---------|------------------------------------------------------------------------------------------|
|         | WSGQFPVKWHIIKDVPNNLLRHIILENNNDNKPVTNSRDTQEVKLEHGLQMLTIFK                                 |
| OsECT4  | AKFFVIKSYTEDHVRHSIKYNVWASTASGNRKLD SAYRLAKEKEDYCPIFLFFSVNGSGQFCGVAEMIGPVDFDKSVDYWQQDK    |
|         | WSGQFPVKWHIIKDVPNNLLRHIILENNNDNKPVTNSRDTQEVKLEHGLQMLTIFK                                 |
| OsECT5  | AKFFMIKSYSEDDIHKGIGIKYNVWASTPHGNNKLDAAFREAQILIKEKGKKCPVFLFFSVNSSGQFVGLAEILGPVDFKKTMDFWKL |
|         | DRWNGFFPVTWHIIKDIPNRLFKHITLENNDNRIVTFSRDTQEIGLLQGLKMLKIFK                                |
| OsECT6  | AKFFMIKSYSEDDVHKGIKYNVWASTPNGNNKLDAAFHEAQILMKEQGKRCPIFLFFSVNTSGQFVGLAEMLGPVDFKKTMDFW     |
|         | QQDKWNGFFPVMWHIIKDIPNRFK HITLENNEGKVVTFSRDTQEIGLPQGLEMLKIFK                              |
|         | VMWHIIKDIPNRFK HITLENNEGKVVTFSRDTQEIGLPQGLEMLKIFK                                        |
| OsECT7  | AKFFIIKSYSEDDVHKS IKYNVWASTSNGNKKLDAAYQEAKEKSSDSSVLLFSVNASGQFVGLAEMVGRVDFNKTLEHWQQDK     |
|         | WTGCFPVKWHIVKDVPNSLLKHIILENNENKPVTNCRDTHEVKLEPGLQVLKIFK                                  |
| OsECT8  | AKFFVIKSYSEDDVHKS IKYNVWSSTPNGNKRLDAAYS DVQGAVGKCPIFLFFSVNASGQFCGVAEMVGPVDFHKDMDFWQQ     |
|         | DKWGSFPVKWHLVKDVPNSTFRHIILENNENKPVTNSRDTQEIPFKSGTNMLKLFK                                 |
| OsECT9  | SNDLRVDYPFAKFFVIKSIGEDDVHKS IKYGVWSSSSSSGNSKLDIAFKDANRIAKRNSTKCPVFLFFSVNGSGLFCGMAEMVGPV  |
|         | DFHKDMDFWCQDKWTGSFPNNENKPVTHSRDTQEIPYVPGISMLKILK                                         |
| OsECT10 | AKFFVIKSYSEDDIHKS IKYNVWASTTNGNKKLDAAYQEAQAKSSKCPIFLFFSVNTSGQFVGVAEMTGAVDFEKTLEYWQQDK    |
|         | WNGSLSLKWHIVKDVPNNILKHIILENNENKPVTNSRDTQEVNLDQGIQMLKIFK                                  |
| OsECT11 | ALFFVIKSYSEDDIHKS IKYNVWASTPNGNKRLDNAFKLAQERVAEKGTCPMFLFFSVNASGQFCGVAEMVGPVDFNRNMNF      |
|         | WQQDKWNGFFPVKWHIIKDVPNPQFRHIILENNENKPVTNSRDTQEVKFPQGSEMLNIFK                             |
| OsECT12 | AKFFVIKSYSEDDVHKS IKYNVWASTPNGNKKLDAGYREAQESSECPVFLFFSVNTSGQFVGVAEMVGPVDFEKTVDYWQQ       |
|         | DKWNGCFPIKWHVVKDVPNNILKHITLDNNDNKPVTNSRDTQEVKLEQGLEMLKIFK                                |
| OsECT13 | ARFFIIKSYSEDNVHKS IKYGVWASTTNGNKKLDSAYREAKEKEEHCPIFLLFSVNASAQFCGVAEMIGPVDFEKSVDYWQQDKW   |
|         | TGQFPVKWHIVKDVPNNLFRHIILENNNDNKPVTNSRDTQEVKLEQGMEMLKIFK                                  |
| FvYTH1  | SRYFIVKSCNRENLELSVQQGVWATQRSNESKLNEAFDSAENVILIFSVNRTRHFQGCAKMMSRIGGSVSGGNWKYAHGTAHY      |
|         | GRNFSVKWLKLCESFHKTRHLRNPYNENLPVKISRDCQELEPSIGEQLASLL                                     |
| FvYTH2  | ALFFVIKSYSEDDIHKS IKYNVWASTPNGNRRLDNAYQDAQEAAHKGCKCPVFLFFSVNASGQFCGVAEMVGRVDFNKNMEF      |
|         | WQQDKWNGYFPVKWHIIKDVPNPQLRHIILENNENKPVTNSRDTQEVKFLQGVEMLNIFK                             |
| FvYTH3  | AKFFIIKSYSEDDVHKS IKYNVWASTPNGNKKLHAAYQEAQEK TG GCPVFLFFSVNTSGQFVGLAEMLGPVDFNKNLEYWQQD   |
|         | KWNGCFSVKWHFVKDVPNSLLKHITLENENKPVTNSRDTQEVKLEPGLKMIKIFK                                  |
| FvYTH4  | AKFFIIKSYSEDDVHKS VKYNVWASTPNGNKKLDAAYQEAQE IATGCPVLLFSVNASGQFVGLAEMVGPVDFEKNVEYWQQD     |
|         | KWTGCFPVKWHIVKDVPNSLLKHITLENENKPVTNSRDTQEVKLDEGLKLIKLFK                                  |
| FvYTH5  | AKFFIISFSEDNVHKS IKYSVWASTPHGNKKLDAAYHEAKRIKCSCPIFLFFSVNASGQFCGVAEMVGPVDFEKDADYWQQDR     |
|         | WNGQFPVQWHIIKDVPNIRFRHILLENNDNKPVTHSRDCQEVNLNQGIELLKIFN                                  |
| FvYTH6  | AKFFVIKSYSEDDVHKS VKYNVWSSTPHGNKKLSSAYEDAQR I AAGNPGGCPIFLFFSVNASGQFCGMAEMVGPVDFNKMDF    |



|        |                                                                                       |
|--------|---------------------------------------------------------------------------------------|
|        | WQQDKWSGSFPVIWHIVKDVPNTSVRHIVLENNENKPVTNSRDTQEIMYKKGLEMLKIFK                          |
| FvYTH7 | TRYFIIKSLSHENIQLSIEKGIWATQVMNEPILED AFHKSGKVILIFSVNMSGFFQGYAQMMSAVGWRRDNVWSQGSSRSNPWG |
|        | RSFKVKWLRRLNDLPFQQTLHLKNPLNEFKPVKISRDCQELSPDVGEALCELLD                                |
| FvYTH8 | AKFYVIKSYSEDDVHKSIIKYDVWASTPNGNKKLDAAFRDAEAKSSETGKRCPIFLFFSVNGSGQFVGLAEMIGEVDNFNDMDFW |
|        | QVDKWSGFFPVNWHVVKDIPNTQLRHIILENNNDNRPVTFTTRDTQEIGLKQGLEMLNIFK                         |
| FvYTH9 | AKFFIIKSYSEDNVHKSIIKYGVWASTPNGNRKLDAAYHEAKEKHDSCPIFLFFSVNASAQFCGVAEMVGPVDFDKSVDYWQQDK |
|        | WSGQFPVKWHVIKDVPNSQFRHIVLENNNDNKPVTNSRDTQEVKLEQGIEMLNIFK                              |

---

Note: At: *Arabidopsis*; Os: *Oryza sativa* L.; Fv: *Fragaria vesca* L.

**Supplementary Table S5. The identification of *cis*-elements in the promoters of *FvYTH* genes.**

| Response Types     | Responses involved                                                          | Cis-elements               | FvYTH<br>1 | FvYTH<br>2 | FvYTH<br>3 | FvYTH<br>4 | FvYTH<br>5 | FvYTH<br>6 | FvYTH<br>7 | FvYTH<br>8 | FvYTH<br>9 |
|--------------------|-----------------------------------------------------------------------------|----------------------------|------------|------------|------------|------------|------------|------------|------------|------------|------------|
| hormone            | auxin-responsive element                                                    | AuxRR-core/<br>TGA-element | 0          | 0          | 0          | 0          | 1          | 2          | 1          | 0          | 0          |
|                    | salicylic acid responsiveness                                               | TCA element                | 1          | 2          | 0          | 0          | 0          | 1          | 4          | 0          | 2          |
|                    | MeJA-responsiveness                                                         | TGACG-motif                | 1          | 0          | 2          | 0          | 0          | 2          | 1          | 8          | 2          |
|                    | abscisic acid responsiveness                                                | ABRE                       | 2          | 2          | 3          | 5          | 0          | 3          | 4          | 4          | 3          |
|                    | gibberellin-responsiveness                                                  | P-box/TATC-<br>box         | 0          | 3          | 1          | 1          | 0          | 2          | 1          | 0          | 1          |
|                    | ethylene-responsive element                                                 | ERE                        | 0          | 0          | 1          | 1          | 1          | 0          | 2          | 0          | 0          |
|                    | total                                                                       |                            | 4          | 7          | 7          | 7          | 2          | 10         | 13         | 12         | 8          |
| stress<br>response | low-temperature<br>responsiveness                                           | LTR                        | 0          | 0          | 0          | 2          | 2          | 1          | 0          | 1          | 0          |
|                    | anaerobic induction                                                         | ARE                        | 2          | 5          | 3          | 0          | 2          | 0          | 3          | 2          | 4          |
|                    | activation by heat shock,<br>osmotic stress,<br>low pH, nutrient starvation | STRE                       | 3          | 2          | 0          | 6          | 1          | 2          | 5          | 2          | 3          |
|                    | wound-responsive element                                                    | WUN-motif                  | 1          | 0          | 2          | 1          | 0          | 0          | 2          | 2          | 0          |
|                    | dehydration- responsive<br>element                                          | DRE                        | 2          | 0          | 0          | 0          | 1          | 0          | 0          | 2          | 0          |
|                    | wound inducibility                                                          | WRE3                       | 1          | 0          | 0          | 0          | 1          | 0          | 0          | 1          | 0          |
|                    | wounding and pathogen<br>responsiveness                                     | W box                      | 2          | 0          | 1          | 2          | 0          | 1          | 2          | 0          | 1          |
|                    | defense and stress<br>responsiveness                                        | TC-rich<br>repeats         | 0          | 1          | 0          | 0          | 1          | 0          | 1          | 0          | 1          |
|                    | stress-inducible                                                            | TCA                        | 0          | 0          | 1          | 1          | 2          | 1          | 0          | 0          | 0          |
|                    | total                                                                       |                            | 11         | 8          | 7          | 12         | 10         | 5          | 13         | 10         | 9          |
| development        | meristem expression                                                         | CAT-box                    | 2          | 0          | 1          | 0          | 2          | 1          | 1          | 0          | 0          |
|                    | endosperm expression                                                        | GCN4_motif                 | 1          | 0          | 0          | 0          | 0          | 0          | 0          | 0          | 0          |
|                    | circadian control                                                           | circadian                  | 0          | 2          | 0          | 0          | 0          | 0          | 0          | 0          | 0          |
|                    | zein metabolism regulation                                                  | O2-site                    | 0          | 2          | 1          | 0          | 0          | 0          | 0          | 0          | 0          |
|                    | meristem specific activation                                                | CCGTCC-box                 | 0          | 1          | 0          | 0          | 1          | 0          | 0          | 1          | 0          |

|                                          |                                                                            |                    |   |    |   |    |   |   |    |    |    |
|------------------------------------------|----------------------------------------------------------------------------|--------------------|---|----|---|----|---|---|----|----|----|
|                                          | seed-specific regulation                                                   | RY-element         | 0 | 0  | 1 | 0  | 0 | 0 | 0  | 0  | 0  |
|                                          | palisade mesophyll cells                                                   | HD-Zip 1           | 0 | 0  | 0 | 0  | 1 | 0 | 0  | 0  | 0  |
|                                          | total                                                                      |                    | 3 | 5  | 3 | 0  | 4 | 1 | 1  | 1  | 0  |
|                                          | Myc-binding site                                                           | MYC                | 4 | 1  | 3 | 4  | 1 | 2 | 4  | 0  | 6  |
|                                          | Myb-binding site                                                           | MYB                | 2 | 7  | 4 | 5  | 6 | 3 | 3  | 2  | 3  |
|                                          | ATBP-1 binding site                                                        | AT-rich<br>element | 0 | 0  | 1 | 1  | 1 | 0 | 0  | 0  | 0  |
| transcription<br>factors<br>binding site | MYB binding site involved in<br>drought-inducibility                       | MBS                | 1 | 0  | 0 | 1  | 0 | 0 | 0  | 1  | 1  |
|                                          | MYB binding site involved in<br>light responsiveness                       | MRE                | 1 | 0  | 0 | 0  | 1 | 0 | 0  | 2  | 0  |
|                                          | MYB binding site involved in<br>flavonoid<br>biosynthetic genes regulation | MBSI               | 0 | 0  | 0 | 0  | 0 | 1 | 0  | 0  | 0  |
|                                          | total                                                                      |                    | 8 | 8  | 8 | 11 | 9 | 6 | 7  | 5  | 10 |
| light                                    | light responsiveness                                                       |                    | 6 | 10 | 9 | 5  | 3 | 9 | 11 | 13 | 12 |

Supplementary Table S6. The CDS sequences of *FvYTH* genes.

| Gene ID      | Gene Name | Sequences                                                                                                                                                                                                                                                                                                                                                                                                                                                                                                                                                                                                                                                                                                                                                                                                                                                                                                                                                                                                                                                                                                                                                                                                                                                                                                                                                                                                                                                                                                                                                                                                                                                                                                                                                                                                                                                                                                                                                                                                                                                                                                                                                                                                                                                                    |
|--------------|-----------|------------------------------------------------------------------------------------------------------------------------------------------------------------------------------------------------------------------------------------------------------------------------------------------------------------------------------------------------------------------------------------------------------------------------------------------------------------------------------------------------------------------------------------------------------------------------------------------------------------------------------------------------------------------------------------------------------------------------------------------------------------------------------------------------------------------------------------------------------------------------------------------------------------------------------------------------------------------------------------------------------------------------------------------------------------------------------------------------------------------------------------------------------------------------------------------------------------------------------------------------------------------------------------------------------------------------------------------------------------------------------------------------------------------------------------------------------------------------------------------------------------------------------------------------------------------------------------------------------------------------------------------------------------------------------------------------------------------------------------------------------------------------------------------------------------------------------------------------------------------------------------------------------------------------------------------------------------------------------------------------------------------------------------------------------------------------------------------------------------------------------------------------------------------------------------------------------------------------------------------------------------------------------|
| FvH4_3g09980 | FvYTH1    | ATGGAGGACCCCGACGGAGTCCTCAACTTCGACTTCGAGGGCGGCCTCGACTCCGCCGCCGTCTCCGCGC<br>CCACCCACACCGGCCTGGCCTCCAGCGCCCCGATCCAGTCCGACTCGTTTCGCCTCCCAGCCCCAAAACCA<br>GGCCGCCCGCGCGCCGACGCCGACCCAAATGTCAACCCGTCGGGGCGGAAGAGCTTCCGGCAAACGGTG<br>TGTCGTCACTGGCTCCGGAGCCTCTGTATGAAAGGCGAGGCCTGCGGGTTCCTTCATCAATACGACAAGT<br>CGCGGATGCCGGTGTGCCGGTTCCTCCGTATGTACGGCGAGTGTAGGGAGCAGGATTGCGTGTATAAGCA<br>TACCAACGAGGACATCAAGGAGTGTAATATGTACAAGTTAGGTTTTGTCCAAATGGTCCTGATTGCCGG<br>TATAGACATGCAAAGCTTCCTGGACCTCCACCCCCTGTGGAAGAAGTCCTTCAGAAGATCCAGCATTGGA<br>ATTCGTACAATTACAACAACCTCAAATAAGTTCTCCCAACCCACGGAATGGTGGTTTTCCCAACAACATGA<br>TAGATCTCAGCCCGCACAAAGTCACCAATTCATTCAATCAAGTGGTTGTAAGACCTTCAGCAGCAGAGTCT<br>GCTAATGTCCAGCAGCCACAGCAATTTAGCAAACCCAAACAACCGGTTGCCAGACTCAGGCACAAAGTG<br>TTCCCAATGGCCTGGCTAGTCAGGCAAATAGAGCCGCACTGCCCTTGCTCAAGGAATATCTAGGTATTT<br>TATTGTTAAAAGTTGCAACCGTGAAAATTTGGAATTATCCGTACAACAAGGAGTTTGGGCAACTCAAAGG<br>AGCAATGAATCCAAACTCAATGAAGCTTTCGACTCTGCAGAAAATGTCATATTAATTTCTCAGTCAACC<br>GGACTCGACATTTTCAGGGTTGTCAAAGATGATGTCCAGAATTGGTGGGTCTGTTAGTGGAGGGAACTG<br>GAAATATGCACATGGAAGTGCACATTATGGCCGTAAATTTCTCTGTCAAATGGTTAAAGCTATGTGAACCT<br>TCCTTCCACAAAACCTCGTCACTTGAGGAACCCATACAATGAGAACTTACCAGTGAAGATAAGTAGAGATT<br>GTCAAGAGCTAGAGCCCTCCATCGGTGAGCAGTTGGCATCCTTGCTTTATCTTGAACCAGATAGTGAACCT<br>AATGGCAATCTCCATTGCAGCAGAGTCAAAACGAGAAGAAGAAAAAGCAAAGGGAGTCAATCCAGAGAAT<br>GGTGGTGAGAACCCAGACATTGTCCCATTTGAGGACAATGAAGAAGAGGAAGAGGAAGAAAGTGACGACG<br>AGGAAGACTATCAAGTTCCTGGTGGAGCAATTGAGAACAGAGGAAGGGGTAGAGTCATGTGGCCCCCTCA<br>TATGCCACTAGGAGGAAGGGGTGGCAGACCTATGCCTGGGATGCAGGGGTTCCCTGGAATGATGGGTCTCT<br>GATGCAATGCCGTATGGACCAGTTACACCTGATGGATTTGTTATGCCCAATCCTTTTGGTATGGGCGGCC<br>CTCGGGGTTTCAATCCATATGGTCCTAGGTTTTCCGGTGATTTTGGTGGGCCCAATCCTGGCATGATGTT<br>TCGTGGGCGGCCTCCACAACCTGGTGGTATGTTTCCACCTGGTCCTTATGGGATGATGATGGGTCCTGGA<br>CGTGGAACCATTTATGGGAGGGATGGGGGTGGAGGTAATAATCCAGCCCGAGGTGGTCGTCCAGGTGGTA<br>TGCCACCAATGTTTCCCCCACACCCACCATCTCAAACAATAACCGGTTGCAGAAGAGAGATCCAAGGGG<br>ATCGGGCAATGATCGGAATGAGAGGTATAGTGCAGGATCAGGTCATGGCAAAGAAATGCAGGCTGGTGGA<br>CCAGATGATGAGAACCATTATCAGCATTTCATCAAATCGTACCAGGAAGATTATGGTGCTGGGAACAATG<br>GTAGGAATGATGACAGTGAAAGTGAAAGACGAAGCACCGAGGCGGTCAAGGCATGGAGAGGGAAAGAAGAA<br>ACGGCGGAGACTCGGAAGGAGATGCTACCTCTGAGCACTAG |
| FvH4_3g13840 | FvYTH2    | ATGGCTGCTCCTCAATTTGAACAACACAATCCTCATCCTCATCAGACAACCTCCCAAACAAGAAGAAGGGA<br>AAGAAAAGGAAGCAAAACCAGATATTCAATCCACAGAGTCCTTCCAATCCAATCTGGCTCTTAGCAAGGA<br>TGGAAGCTCATCTGATGCAGCATCATGTATATCAACTGCAGGAGATACAACTGCTAGTGTGAAAAAAGGT<br>GATGCAGATGTAGATGCAGATTATGAATCCATGGCTTCCTATCCAACCCACCGCCTATTATGGATACAGCT<br>ATCCAGGTAGTTATGATATGGAAAACCAAGGATACTATGTCCGTGGAAATACTGGGATGGAAGCTCAATA<br>CCCTGTCATGCAAGCAGATAATGGCTCTTTGTCTACTTGATGCCAGGATTTAGCCTGGCTATGATCCT                                                                                                                                                                                                                                                                                                                                                                                                                                                                                                                                                                                                                                                                                                                                                                                                                                                                                                                                                                                                                                                                                                                                                                                                                                                                                                                                                                                                                                                                                                                                                                                                                                                                                                                                                                                                                     |

TACATGCAGTACCTGCCCATGACTACAATCAGTAGTGATGGACAATATGTTGGTCAACAGATGTATTCAT  
CGATCAGCCCCATATACCAATCTCCAATCAACTCCCCTGGATATAATATTCCCTCTCCTCTTCCTTATGG  
GGAGTTAAGTCCAACACCCTACTTGTGGGACCCATCTCTTGTCTGGAGATGGAACATATGGAAATGGCTAC  
AATGGAGTTTTAGAAACACCGAATTCTAAATCTAATTTCTCATCCCCTAGTCACACTCGTGCTCCATTCT  
CTAAATCTGATACACCACCTTCAGGCAACACTCCTTTAGAGACTAAGAACTTGGGTTATGGTGCACGAAA  
TCAGCCAAAACCAGTGAACAAGACATCACTGCATGCTCCGGCTGTCCAATCGGAAGCAGCAGCGAAAGGT  
TACTATTCTGTTGCAAAGATCCCAGTCTATAACCAAGGGACAAGTGGTTTGCTGTATCCAAACAACCTCGT  
TAAAAGCAAATCCAAAGAGTTGGGGTGGTCCTGAGAAGGTGAAAACAAGAAGCAAGGCTAATAGTGTGAG  
AGATATCAATTTGTTTAGCGAGAAAAACCGGTCCCAGAACAACCAATCCTAAGGGCACCATAGTCTCC  
GCAGCTGACAAGGAGAATGAAAAATGTGACGGCACAAATTCTATTATCAGGAAGGATCAATATAACCTTC  
CTGACTTTCCGACCAAATATGAGCAGGCACTGTTCTTTGTCATCAAATCTTACAGTGAAGATGATATTCA  
TAAGAGCATCAAGTATAATGTATGGGCTAGTACTCCTAATGGCAATAGGAGGCTGGACAATGCTTATCAA  
GATGCACAAGAGAAGGCGGCACATAAAGGCTGCAAATGTCCTGTGTTCTCTCTTTTCGGTTAATGCAA  
GCGGTCAGTTCTGTGGAGTAGCTGAAATGGTTGGCCGTGTTGATTTTAATAAGAACATGGAATTCTGGCA  
ACAGGATAAGTGGAAATGGTTATTTCCCAGTCAAGTGGCATATCATAAAAGATGTTCCAAATCCCCAGTTA  
CGACATATAATACTTGAGAATAATGAAAACAAGCCTGTGACCAATAGTCGAGACACGCAAGAGGTTAAAT  
TCCTTCAGGGTGTTGAAATGTTGAACATTTTCAAAAATCATTTGTCAAAGACATCGATATTGGATGACTT  
TGATTTCTATGAAAGCCGTCAGAAAGTGATGCAAGAGAAGAGGATCAGGCAGTCCACTCCTTACTACGAT  
ATGCAGGTTTGCTATTGCTCTTCTTTTCACTTTTTCGGTAACACTTGCATAGTTTCTTTTACTGGCATCT  
CCAGTCACAATCATTTAAGGAACATATAG  
ATGAACAAAACCTCTTTTTCCAAAAACCCAAACCCTTGGCGGCTGTTAGACCCGTTGTCTCTCTCGCTC  
CAAGTCTTCTCTCTCTCATCCGTTTTGCTAAACCCCCCAATTTGGGATTTTAGGGATTTGAGGCTGAC  
TTTGGAGTTTCGAGCGAGGGCTTCTAGAAGATCCAGCTACCAATTCTCGGCCATGGCCACCGTTGCTCCT  
CCCGCAGATCAAGCAGCAGATTTGCTCCAGAAGCTGTCAATAGATTTCGAGACCAAGACTCTGGAAATTC  
CAGAGCCTACAAAGAAGCCTTCTGTTAACCAATACGGGTCTATTGATTCTGGCAATGCTGTGAATGGTCA  
GATCCCATCTGATCGCTCTGTGACTCCACTGTGCACTGACTTCACGGATCAATCTTTCTCCTATCTCCCA  
AATGGTTATCCATCTGCAGCCTATTACTATGGAGGCTATGATGGGGCTGGCGACTGGGATGAGTACTCGA  
GATATGTGAATCCAGAGGGAGTAGATATGACTTCGGGGGTTTATGGAGATAACGGGTCTCTTATGTACCA  
CCATGGTTATGGGTATGCACCGTATGGGCCTTATTCACCAGCAGCTTCCCCTGTTCCAACCTATGGGAAAT  
GATGGTCAGTTATACGGGCCTCAACATTACCAGTACCCGCCCTATTTCCAGCCGCTGACTCCAACCAGTG  
GGCCATACACTCCCAGTCCTGTAGCCCCCTCAGAATGAGGTATCAACTTCCTTAGGTGCTGACCAAAAGCC  
TCTGCCAGTGGAAACAGCTAATGGAATTTCTAATGGCATTGCAAATAATGCAAGTGTGAAAGGAAGTAAT  
GGTTCAGCTCCCCTATCGACGTATCAAACCACGTCTTTCAACTCCAATGGTTCATATGGACGAGGTGCTT  
TGCCTGCACGTGTTCTTACTCCTGGTTACCAGGACCCAAGATATGGTTACGACACAGTACGGTCTCCAAT  
CCCCTGGTTAGATGCCCCACTTTTTTTCAGATGGGCAGCATAGACCTATGGCAAATACACCCATTACTTCA  
AACTCGAATGGCAATAGAATTCCATCTTTGAGGAACCAGAACTACCGTCCAAATTCGCACTACATGGGTT  
TGCACCACCCAGACCGCTGTCAGGAATAGGTACAGCTCAAGGGTTTATGAATAGCAGCATGTACCCAAG  
CAAGCTATTTGGCCAGTATGGAAACACAGTCAGATCTGGTCTGGGATATGGGTCTCATGGTTATGATTCTG

FvH4\_3g45840 FvYTH3

CGAACCAGTGGACGCACATGGCTGGCTGTTGACAACAAGTATAAACAACCCAGGGGGCGTAATGGTGGTT  
ACTATGGATATGGTAATGAGAACTCGGACGGTTTAAATGAGCTCAACAGAGGACCTCGGGCAAGAGGCTC  
AAAGAACC AAAAGAGTTTTACCCCTAGTGCATTAGCTATCAAGGGGCAGAATGTGCCAGCAAGTCTTAGT  
CATGATGAGGAAAAGGATACAAGTACTGTTCCAGACAGAGAGCAATACAATAAAGCAGATTTTCCAGAGG  
ATTATACTGATGCCAAATTCTTTATTATCAAGTCATATAGTGAGGATGATGTCCATAAGAGCATCAAGTA  
TAATGTTTGGGCCAGTACACCAAATGGCAACAAGAAGCTTCATGCAGCATAACCAGGAGGCTCAGGAGAAG  
ACTGGTGGCTGCCCTGTATTTCTTTTTTCTCGGTCAATACCAGTGGGCAATTTGTCCGCCTCGCTGAGA  
TGTTGGGGCCTGTTGATTTCAACAAGAATTTGGAGTACTGGCAGCAAGACAAATGGAATGGCTGTTTCTC  
TGTCAAGTGGCATTTTGTTAAAGACGTTTCTAACAGTTTGTGAAGCATATTACTCTTGAAAATAATGAG  
AACAAACCTGTGACTAATAGTAGGGACACTCAGGAGGTTAAGTTGGAACCAGGGCTTAAATGATCAAAA  
TATTCAAGGAGCATTCAAGTAAACATGCATTTTGGATGACTTTGGATTTTATGAGTCCCGCCAGAAGAC  
AATCCAGGAGAAGAAGGCCAAGCAACAGCAGCAGTTTCAGAAGCAGCAGGTATGGGAAGGAAAACTCTT  
GATGAGAAGAAAGAGGTAGTGGCAAATGGACAAGTGAAAACACAAAATTCATCGGATGTTCCCTCTGAGA  
TAAACAAGGAATCTATCCCAACAGTGCATGCCAGCGAGGAGCTGAAACTTGAGAAAATGGATCAATTGC  
GACTGGCGAAGCCCCAAAGGGTGCTAAACCGGTTGTGGCTGAGAAGAGGGCTGTAGGAAATGGGGTTGCA  
AACGGTTGCTAG

FvH4\_3g45841 FvYTH4

ATGGCCACTGTGCTTCACTCTCGCCTCCTGCGGATCAAGCTTCAGACTTGCTGCAGAATTTGTGCTTGG  
ATTCTCAGGCTAAGGATGTCAAGATTTCTGAGCCCCCAAGAAGGCCAATGCTGTGACTGGAAAGCTCCA  
GTCAACTGACCGGACTAGGTCTACTACCCCATCACTCAAGGATTCAACCATGCCCTATCACCTAATGGT  
TACTCCTCTTCTGCTTATTACTATGGAGGCTATGGTGGACTTGAGTGGGGCAACAATATGAATTCTGTTG  
TCTATGGTTATGGCTATGCACCCTACAACACATATTCAACAACAGGGTCTCCAAGTGGGAAGTGGTCA  
GCTATATGAACAGCAGTATCAATATCCTCCCTATTTTAAGCAGCTGGCTCCTAAACTGGTTCACCCTAC  
ATGCCTAATTCAGCTGTTCTTCCAATGGTGGTGTTCACCATTAAAGGATGCTGACCAAAAGTCCTCAC  
CAGTAGGAACAGCTAATGGGATATCCAACAGTACTTTGACCAGTGTGGGGCTGAAGGAAAATAATCTTTC  
AGACTTCTCCAAATATCAAAATTCCTCTTTGAATGCAAAGGGTTCCTATGAGGGATACACTGATGCCATA  
TATGGTTTTGATGGTTTGATGTCTCCCATACCATGGTTAGAAGGGTCAACGTTTTCAAATGGACAGGCTA  
AGGGGACTGGATATACAGGCAACAGAACACTATCTTCTAAGAATCAGATTTACGACCAAGCTCTCCATA  
CATGGGTTTGCTGCCAAGGTTGGGGTATGGTTTGGATACATCTCGTGGACTTAGTGGGATGTATAGCAAC  
GATTTATATGGTCATAACTGGAACACATATGGACTTGGTATGGGGTTTGGATCTAATACGTTTGGTATGT  
CAAGAAATGGATATGGGTGGACCTCTGTTCAAACAAGTTTAAACCTAGGGGGCGAGGAAGCAACTTTTCG  
CTATGGTAACCAGGACATAGATGGGTTGGAAGAGTTGAACAAAGGACCTAGAGGTAAGAGTTATAAAGCT  
GGGGTCAATGTCGGGTGAATAAAGCTAATGATGAGAAAGATACAAGTACGCGCGTTCCAGAGGGGGGAGC  
AGCGCTCAGGAGCAGATATGCTTGATAATTACTCAGATGCCAAGTTCTTCATTATAAAGTCATATAGTGA  
GGATGATGTTTCATAAGAGTGTTAAGTATAATGTCTGGGCCAGCACACCAACCGAAACAAGAACTTGAT  
GCAGCATAACCAGGAGGCTCAGGAGATAGCTACTGGCTGCCCTGTATTTCTGCTCTTCTCGGTAAATGCTA  
GTGGCCAATTCGTTGGCCTAGCAGAGATGGTAGGGCCAGTTGATTTTGAAGAAGTGTGGAGTATTGGCA  
ACAAGACAAGTGGACTGGTTGTTTCTGTTAAGTGGCACATTGTAAAGGATGTACCCAACAGTTTGCTA  
AAGCACATTACCCTTGAAAACAATGAAAACAACCTGTCACAAACAGTAGGGACACTCAAGAGGTCAAGT



TAGATGAGGGGCTTAAATTGATCAAACCTATTCAAGGATCATTCCAGTAAAACATGCCTTTTGGATGATT  
TGAGTTTTATGAAGATCGCCAGAAGACAATTGAGGAAGTTAAAGCAAAGCGGCAGATCCGGAAGAAGAAG  
GTATTGGAGGAGAAGCCCACTGATGGGGTAGAAGAGGCACTAGTCAAATCACCAGAGTCATTGGGAACTA  
CATTGGATGTGAAGGAACCAACATCAGTTGATCAGAGTGATGAACAAGTGAAGCCTTTGGAGAATGGAAC  
CGTTGCAGAAGCTGGAGATGGCCTAAAGAGTCCACAATCAGTTGTTGAAGAGTCCAAGGTGGCTGAAACA  
AATTAG

FvH4\_4g00190 FvYTH5

ATGGACGACCAAGATCGAATCGTCTCCACCGGAGAGAGGCCTGTTAAGCCAGATGTCTTGAAAGAGCAGC  
CAGCTTCGCCCCAAAGATGAGAGGATAGCTTCAGCAAATCCTTCTCCGGCTGCACTCATAACAGGGCCTTC  
ACACAATGCCACAGAACAACCCAAGTTTTAGATGGTGGTGGAGAACATAGCTCCACCCATCCACTCAAT  
TTGTATGGGTCCAACGAACCGAGTATGTCTTATAGTGGTTATGGAAGTAGCACTGGTACTTGGGATGGAT  
ATCCTCAGTATCTCAATACTGATGGAATGCATATTGTATCACCGGTCATGTACAGTGATAATCCGTCTCT  
TCTGTATCACTCTGGTTATGGTTTCAATCCCGAAATTGCATATGGACAATATTCACCAGTCACTACACCT  
TTGGCTTCTTATTTTCGTAGATGGCCAAGTGTATTCTCCACAACAGGTCCCCTTCTCTCCATCTTATTACC  
CACAACCGTCTCCTCCAAGTCTGTCTCCTATTACTTCAGCTTTTCCATTGACGCCGACTGAGCTGATGAC  
CTCAGAGAGTAGCAGCACTGACAACATGGCCTTTGGGCCAGGATCAGGTTACTTTGTAAATTTTAGATCA  
TTTAGTGGAGCAGATCTGTCTGGAATCTTGGTTTCGAGCCCTTTAGCATCTCCAGGGATTTATCCTCAGC  
CTATGGGCATACTTGGATCTTATGAACAGAGTGTTGGGCAGATTTCTCATCCACAGAGGTCAATGCATGG  
ATATGGGCTGGTATCTAGTTCCTTTACAGGGCGCTACCCACAGAATACTTCTCATCAGGGCTCCAACCTT  
GGTGGTCCTTCCCTTTCTTACTCGTTTGGTAATGACCCGAGCCGACTGACTGTTGACAAGGGTAGAAGAA  
GAGAGAGGGACTGGGATTCAGTTTCTGTTTTAGTAATTCACATGATATCTCCAATGACCGCAATCGAGG  
ACCGAGGGCTTCAAAGCTGAAGGACAAGAGCGTTTCTGACCAGGGCTTTCATCTAGTGCCAGGAAAATG  
GATTTATCTGCTTCTGGAATCAACCTTGACTCAATTAACCGGCAGGATTTTGTACAGATTACAAGGAGG  
CAAAGTTCTTTATCATTAAAGTCTTTCAGTGAGGATAATGTTTCATAAAAGTATTAATACAGTGTTTGGGC  
CAGCACTCCCCATGGAACAACAAAGCTTGATGCTGCTTATCATGAGGCGAAGAGGATAAAATGCAGCTGT  
CCAATCTTCCTCTTATTTTCGGTTAATGCTAGCGGACAGTTTTGCGGAGTAGCCGAAATGGTTGGACCAG  
TAGATTTTGAAAAAGATGCTGATTACTGGCAGCAAGATAGGTGGAATGGCCAATTTCCAGTTCAGTGGCA  
CATTATTAAGGATGTTCTTAACATTGCTTCCGTCACATTCTACTAGAAAATAATGATAATAAGCCTGTC  
ACTCACAGCCGAGATTGTCAGGAGGTGAATCTGAACCAAGGAATTGAGCTATTGAAAATTTTCAATGATC  
ATGATGCACGGACATCTATAGTTGATGATTTTGAATTTTATGATGACCGCGAAAGGTCCTTGAAGGAAAG  
GAAAGCCAGACAACAGGCTTGTGCAACTAAAGATGCCTCTGATTCACTTGCTCTTGAGACTGTTAAGGAA  
ATTTCTAATCTTTCCGATCAAGCCTTGGAGACTGTTAAGGAAAGGAAAGCCAGACAACAAGCTTGTGCAA  
CTAAAGATGCCTCTGATTCATTGCTCTTGAGACTGTTAAGGAAATTTCTAATATTTCCGATCAAGCCTT  
GGAGATGAAAGGAAGTAGTGGCAAAGAATTTGCCGAAACTGAACATGAGAGTAGCTCCAAAACGGATTGCG  
GTTGTATATGAACATGATGCTGTACAGCAAATATCTGATAGTTTATCTCAAGTACTGCAGTTGGAAGAGA  
GTGACAAAGAGTTAGTACCATCATCTGAAAGAGGTGTCACACCTGACAGTGAGTTTGTTGATGAGAAGGT  
AACAGTTGTATTAACCTAA

FvH4\_4g21030 FvYTH6

ATGTATAATGTTTCCTGAACATGCAAATAACGAGGTTTATATGATCCAAGGGATGGAACCTAATATGCATT  
TCGCTGCTCCCTTTGAACAAGTTGATGCCATGTACAATGAAGGAGCCCCTGAGTATGTTGTTGATCAGGG

CATGTATTATCCAACCGCCAACAACACTATGGGTACTACGGTACAGGATTTGAATCACCCGGTGAATGGGAG  
GACCAACGTAGGATTTTTGGTGTAGATGGTCCAGATGTCCAGTACACGGGTCCGCAAAATGAAAGTTTGC  
CTTATGCATATTATCCACCTGGCTATGGATATGCACAGACTTTCATACAACCCTTACAACCCTTACATACC  
TGGTGCTATGATAGGTGTTGATGGCCAACAGTATTATACTATCCCCTCTTATCAGAACTCTGTCTCTTCA  
CCCGCTTATGTCCCTTTTGTTCAGCCGGATGTCATTCCCAACAGTTCAGCTGAATCTTTGTATGATACTG  
GATCATCTATTAACAGACCTGGTGGAAGAGGCCCTTCAATATAATTTGAACTCCGCTTCTGGAGCCTTCTC  
TAACACTTCTAAGACGTCTTCTAATCAGATGAGCCCCTTGACTAGGTTATTAGAAAGGCCAAGAGGCAAT  
GTTGGACCAAACAAGCAAGCTGTAACCTCATGGTAGTGTTCCTTCTGGTCGTTTTCCGAACCCTACTCACC  
AGAGTAGAAGTGCGTCCGGCTCAGTTTCAGCTGTGGATAACCTTTCAAATGGGAAAGTACTGCCTCATCA  
CAATCAATTGAAGGTAGCAATCCCTGTTGGCAATGGCTTATCTGATTTTGGGTCCGGTGCACAAGGACGA  
GATGCTGTGGCTAAGCCTCGGCCAAAGTTCCATGTTGGCAGGGCCTTGAATGATATACATGGTAATGTAG  
AGCCGTTGAGTGAGCAGAATTGTGGTCCTAGAATCAATAGGTTGAAAAATCAATTAGCTGTTAAAGCCTA  
CACAACCAAGGCGGGAGATAGTAATGCACAAGGAAATATCATTATTCGCACCGATCAGTATAACAAGGAA  
AGTCTCCCAGTTGATTATGCGCATGCAAAATTTTTTGTAAATAAATCATACAGCGAGGATGATGTGCATA  
AGAGTGTTAAATACAATGTGTGGTCATCCACACCCCATGGCAACAAGAACTAAGCAGTGCTTATGAAGA  
TGCCCAACGAATAGCTGCAGGCAACCCTGGAGGCTGTCCTATTTTCCTCTTCTTTTCGGTAAATGCAAGT  
GGTCAATTCTGTGGCATGGCAGAGATGTTTGGCCCGGTTGACTTCAACAAGGACATGGACTTTTGGCAGC  
AAGACAAATGGAGTGGGAGCTTCCCTGTTATTTGGCACATTGTCAAAGATGTGCCCAACACCAGTGTCCG  
GCACATTGTATTGGAGAACAAATGAGAACAGCCGGTGACTAATAGCAGGGATACACAAGAGATCATGTAC  
AAGAAAGGCTTGGAGATGTTGAAAATATTCAAGAATCACACAATGAAGACCTCATTGCTTGATGACTTTA  
TGTAATATGAGGACCGTCAAAAAATCATGCAAGATGAGAGAGGCAGGTATGTTGTTAGAAATTTTCGAGAC  
CCCATTCTCAGTAACAGCATTAGGTCCCCCACGCAAGGTGAACCCTGTTTCGTGAGCTGCCTCGCAGCAAA  
GAGGAAAAGGACACCAAACCTAATGATGCAAAACACTTCGAAAAGTCTCTGGTTCCCTGTATCTGAGCAGG  
TTTCCTCAAACTTAGATGTTAAATGTGCGAGTATTAGGGGTGGTAAATCAGAGGAAAAGACACTTGAAGC  
AGAAGATGATGCTGTATCTACCTTAAAAATTGGTTCTCTCACTATTGATCCCAAGTATGTGGAACCTTGAT  
TCTTCAGCTGGTGCTGCTACTGCTACTTCAAAAAATGTTGATGTTGTCACTGTTGGCTCAATTCCTGTTA  
AAGTAAATGGATTTGCTGAATCCTTGGGTACTTTAACAGTTGGAACGATCCCTCTGGATCCTAGAGCACT  
AAAACCTTGAGAAGGGCAGTTCTCTCAACTAA  
ATGTCGTGTGATACTGCAAAGGAAAATGCATCTGTAGTGGATTCTCTGTTACTGAAAGGAAAGAAGACA  
TGGGGAATTCAGACGGGCCTGAGAGTTCAAGTCACAAAGGTACTGAGGGGGTTGATCCATCTAAGTCAGA  
AGAAGTTGGGCACTCTCATGACCGTGTTCGGGATTACCTGCAAGAAAAAAGGGTAAATTGTATGGTACA  
AGATATTTTCATCATTAAGAGTTTGTACATGAGAATATCCAATTATCCATTGAGAAAGGAATTTGGGCTA  
CTCAAGTGATGAACGAACCAATTTTGAAGACGCTTTTCATAAATCTGGTAAAGTAATTTTAATATTCAG  
TGTCACATGAGTGGATTCTTCCAAGGGTATGCACAAATGATGTCTGCTGTTGGATGGAGGCGAGACAAT  
GTATGGAGTCAAGGAAGTAGTAGAAGTAATCCCTGGGGGCGCAGTTTTAAGGTCAAATGGCTGCGATTAA  
ATGATCTGCCTTTCCAACAAACTCTTCATCTCAAGAATCCATTAAATGAGTTCAAACCTGTTAAAATTAG  
CAGAGACTGTCAGGAGTTGTCTCCAGATGTTGGAGAAGCGCTCTGTGAGCTTCTTGATAGGCATAATGAT  
CTGAATGGCATGAACAGTATTGACATGGATGATTTTCTTCTAAAAGGCCCTGCGTAGAGCCTCCATGTT

FvH4\_5g01140 FvYTH7

CAGTAGCGGAAGAAGAGTATAATATGCCCCCAGTGCATCTCTCATGGTCGCAAACCTCCCATGCTCTATCC  
TTCCATGCTTTATCAACATCAGGCTGAAACAAAGGGATTTCATTTTGCGAATCAGAAATGTAATGAAAGG  
CGGCCAGCTAGTGTGTTTACTGAGGATGATTTTCTTGAAATGTCTTATGAAGAATACCTAGAGGTCTATG  
GCAGAAGCAGGAAGGAACTGTATCAGCCTGGTTCTACATCACAGAAGTCATCCAGAAGTAAAGTGCATGA  
GGATGATATAAACTCAAGTTACGGAAGTAACCGCAGCTGCTCAAGGAAAAGAGCTCATCAGTCATCCCAT  
AAGCAATCACAATGTTGA

FvH4\_5g30420 FvYTH8

ATGGCCCGGTGAGAAGAAGATTGAGAAAGCTGAACCTGTAGCCACTGTGTTGGCATCAGACTCTGTTAACG  
GATTAGGAGAGCCGCAACTGGTCTCTGGGAAAGAAGGGAAACCATATGATGCGATCTCCTCCATGACTTC  
TTCAAGGGATGCCACCCATAGCATCAAAGGATATAATGGATCCTATACTCAATTGGACGAACATCGCTAT  
GCAAATGCTAGTAATTCACATACGGGTGTGCAGTCGGACAATGGTTCAATGGTCTATTATCTTCCCAGCT  
ATAATCCTTATGCCCTGGAACCTTTATGGGTGTGATGGCCAAGGTGTGGTCAACAGCAGTATTATTC  
TTCATCAGGTTATCTTCAACCACCTGTTTTATATGGTTTCAAGCTATGCCTTGTTATTCATGGGACACA  
ACACTTTCTGGTGATATCTCTACAGCAACAACTCTGGTTTTGGAAATCTAAAATCTGGACCTGGTGGCA  
CAACTCTATCTAGGTCAAGTGGCTACAAAGCAAATGGCAATCTTGCTAGCAAATTTTCCAAGCCTTTCCC  
TTCTACACAACCCATCAAATCTTTAAACAAGGTGCCTTATTTAGGTTCTGATTTCTCAGCCGGTCTTTTG  
AAGGGATATCCTTCGACTGGAAGATTCTCATCTACTAACCAGAAGGGTCTGTTTCCTCTTAATGGTG  
AAGCAAACCTACAGATCTAATGGGAGGATTCTAAATGTAAACGACAGATTCAAATCAAGGGATAAATTTAA  
TAGAAATGAGGATTTTGAATCCTCAACTGAGTTGACACGTGGTCCAAGATCTCGCAACAAGAGTCCTCCT  
TCAGACTCGGCAGTTGAGAAGGAAGTATTGGGGTTTACAGTCAGTAGGGATAAATATAACCTACCAGATT  
TTCAGACTGATTATGAAAGTGCAAAGTTCTACGTTATTAAGTCATACAGTGAAGATGACGTCCATAAGAG  
CATTAAATATGATGTCTGGGCCAGCACTCCAAATGGCAATAAGAACTGGATGCAGCATTCCGTGATGCT  
GAAGCAAAATCTAGTGAAACAGGCAAACGGGTGTCCTATCTTCCTCTTTTTCTCGGTGAATGGTAGTGGGC  
AGTTTGTAGGCCTAGCCGAGATGATTGGGGAGGTAGATTTTAAACAAAGATATGGACTTCTGGCAAGTTGA  
CAAGTGGAGTGGGTTCTTCCCAGTTAATTGGCATGTAGTAAAGGACATACCTAACACTCAGTTGCGGCAT  
ATTATCCTTGAAAACAATGATAACAGACCTGTAACGTTTACCCGGGACACACAAGAGATTGGACTGAAGC  
AAGGTTTGGAAATGCTTAACATATTCAAAAGTTATGAACCCAAAACATCCTTGCTAGATGACTTCAATTT  
CTATGAAAATCGAGAAAAGTCTCTACAGGCCAAAAGGGGCAGCAAACCTGCGACTTTAAAGATTGAAACT  
AATGATGATGGAGATATCTCTAAGCATATGAATACTGGAGGGGAAGACTTTGAAGCTAAATCGGGTGGA  
TCGGGATGACTTCTGACCGAACATCTCTCATTTCACTTACAAAAAATCTCTCCCTCAATGCTTGA

FvH4\_6g36470 FvYTH9

ATGGCGGCAAACCAACCGCAGGGTACAGATCGTACATCTGACTCTTCTAAGTCACTGAGCATACTGATCA  
TGGATGCAGAAGAGAAACCTGCTGAACCTGATACCATGAAGGAGCAGACTCTTGAGCAAAAAATGAGAG  
GTCAATTTCTCCTAATCCTTCTCAGGATGCTGGCCCAATAGGTCATCCAAGGGAAGCAGCAGCTCAACCG  
GGTTCTTTTCGATCACACTGTTTTTCCACCTAATGTGTATTCCCCTCAAGCACAGCAGACCTTCTACTATA  
GAGGTTATGAAAATGGAACCTGGTGAGTGGGACGAGTATCCTCCATACCTCAATTGGAAGGTTTGGAGAT  
TACTTCTCCTGGTGTCTACAATGAGAATCATCCATCCCTTGTCTATCATTCTGGGTATAGCTACAATCCG  
CAAATGCCATATGGGCCCTACTCTCCGGTCACAACACCTATGCCTTCTGGAGGTGGAGATGGACAGTTAT  
ATTCCCCCAGCAATTTCCATTTTCAGGACCACCTTATTATCAGCAGCTAGGACCTCATAGTATGCCATA  
CATTACTTCACCAACTCCAGTTTCACAGCCAGATCTCACCACCTTAGTTAGTATTGATCAACAAGGTGAC

AGCATGCTTTTTGGACCAAGACCTGGTTATTCTCCAGTGGGCTCTTATGGTAGAGGCAGTTTTCTGGAA  
ATCCAGGTAGTTTTGGTTATCATGATATGCAGCAAGGGTTTGATGGATTGAGATCCGGAGGACTTTGGTC  
TGA CTGGTCAAAACCCTCGGACAGGCAGAGGTCATATACTCCCTTGTCGCCAGCAGTATCTCCACAGCCA  
ATTGGCCCACTTGGCTCATTTGGGCAGAATGTCGGAATGGGTTCTCAACACCAAAGGTCTATGTATGGTT  
TTGGATCTGGCTCAA ACTCTTATAACAGAGGCTACATTCTAGTGGTTTTAATCAGGGCTCTAGCCTTGG  
AAGTGGATCCTTTTTCCAGTTTTTGAGCCAACAACCGAGGCTTTCTGTCTGTTAGAGAATAGCAAGCAGCAT  
GTTAGAGGCACCGGTCCAATATGCAGTTGCAATGCTCCCCTTGATATTCTTTGTGAGCAGAACCGAGGAC  
CAAGGGCGTCAAAGCCAAAGGCACA ACTCATTGCTGATAACTCAGTTGAGAGCACTAACTAATTACACC  
TACAACCAAGGTT CATGATGAAACATACAACCGGCCAGATTTTGTAACAGAGTACAAAGATGCTAAGTTC  
TTTATCATCAAATCTTACAGTGAAGATAATGTT CACAAGAGTATCAAATACGGTGTCTGGGCTAGCACAC  
CAAATGGTAACAGAAAAGTTAGATGCTGCATATCATGAAGCTAAGGAGAAGCATGATAGCTGCCCAATTTT  
TCTCTTGTTTTCGGTGAATGCCAGTGCTCAGTTCTGTGGGGTGGCTGAAATGGTTGGACCTGTTGATTTT  
GACAAGAGTGTGGATTACTGGCAGCAAGACAAATGGAGTGGGCAGTTCCTGTCAAGTGGCATGTAATTA  
AGGATGTCCCAAATAGTCAGTTCCGT CACATTGTTCTTGAAAATAATGATAACAAGCCAGTGACTAACAG  
TCGAGATACTCAAGAGGTAAAACTGGAGCAGGGAATTGAGATGTTAAATATTTTCAAGAATTTTGAAACA  
GAAATGTCCATTCTAGATGATTTTGATTTTATGAAGATCGTCAGAAGGCAATGCAAGAGCGGAAGGCCA  
GACAGCAAGCCAGCCTGGTTACTGTAGGTGTAGTCGGGGAAAATGAGCATAGAAGTACCGTTCAAATTCC  
CACTGATCTCATCAAGCACATGTCGAAGAGTTTTGCTCAAGTGGTCCGCTTGATGAGGGTACTAAAGAA  
GCTACCGCTGTTTCTGATGGTCCCATCGGGACTAGAGTGAACTTGAAGATGCAATTCCAGTGTCCGTCT  
CCTCTGCTCAGATCAGTTAG

---
